# Supplementary material for: Prenatal Polybrominated Diphenyl Ether Exposures and Neurodevelopment in U.S. Children through 5 Years of Age: The HOME Study
Source: PubMed Central journal article supplement (PMC4123029; doi:10.1289/ehp.1307562), 2014-05-28
Supplement: ehp.1307562.s001.pdf [file ehp.1307562.s001.pdf]

## **Supplemental Material**

# **Prenatal Polybrominated Diphenyl Ether Exposures and Neurodevelopment in U.S. Children through 5 Years of Age: The HOME Study**

Aimin Chen, Kimberly Yolton, Stephen A. Rauch, Glenys M. Webster, Richard Hornung, Andreas Sjödin, Kim N. Dietrich, and Bruce P. Lanphear

| <b>Table of Contents</b>                                                                                                                                                                                                                                     | <b>Page</b> |
|--------------------------------------------------------------------------------------------------------------------------------------------------------------------------------------------------------------------------------------------------------------|-------------|
| <b>Table S1.</b> Comparisons of demographics, socioeconomic status, prenatal PBDE concentrations, and Bayley scores between 190 children followed and 119 children loss to follow-up at age 5 years.                                                         | <b>2</b>    |
| <b>Table S2.</b> Estimated score differences and 95% confidence intervals in Bayley Psychomotor Development Index and BASC-2 behavior rating scores at ages 1-5 years by a ten-fold increase in maternal BDE-47 concentration.                               | <b>3</b>    |
| <b>Table S3.</b> Estimated score differences and 95% confidence intervals in cognitive and behavior rating scores at ages 1-5 years by a ten-fold increase in maternal Sum <sub>4</sub> BDEs concentration.                                                  | <b>4</b>    |
| <b>Table S4.</b> Estimated odds ratios and 95% confidence intervals of having cognitive and behavior rating scores one standard deviation from the population mean at ages 1-5 years by a ten-fold increase in maternal Sum <sub>4</sub> BDEs concentration. | <b>5</b>    |
| <b>Table S5.</b> Estimated score differences and 95% confidence intervals of Bayley MDI and WPPSI FSIQ in separate models by a ten-fold increase in maternal PBDE concentration                                                                              | <b>6</b>    |

**Table S1.** Comparisons of demographics, socioeconomic status, prenatal PBDE concentrations, and Bayley scores between 190 children followed and 119 children loss to follow-up at age 5 years.

| Characteristics                                                         | Followed at age 5 years | Loss to follow-up at age 5 years | p    |
|-------------------------------------------------------------------------|-------------------------|----------------------------------|------|
| Maternal age (years), n (%)                                             |                         |                                  | 0.64 |
| <25 years                                                               | 39 (20.53)              | 24 (20.17)                       |      |
| 25-34 years                                                             | 122 (64.21)             | 72 (60.50)                       |      |
| ≥35 years                                                               | 29 (15.26)              | 23 (19.33)                       |      |
| Maternal race/ethnicity, n (%)                                          |                         |                                  | 0.19 |
| Non-Hispanic White                                                      | 122 (64.21)             | 85 (71.43)                       |      |
| Non-Hispanic Black and others                                           | 68 (35.79)              | 34 (28.57)                       |      |
| Maternal education, n (%)                                               |                         |                                  | 0.32 |
| High school or less                                                     | 44 (23.16)              | 26 (21.85)                       |      |
| Some college or 2-yr degree                                             | 50 (26.32)              | 22 (18.49)                       |      |
| Bachelor's                                                              | 60 (31.58)              | 41 (34.45)                       |      |
| Graduate or professional                                                | 36 (18.95)              | 30 (25.21)                       |      |
| Maternal marital status, n (%)                                          |                         |                                  | 0.11 |
| Married or living with partner                                          | 149 (78.42)             | 102 (85.71)                      |      |
| Not married and living alone                                            | 41 (21.58)              | 17 (14.29)                       |      |
| Household income, n (%)                                                 |                         |                                  | 0.23 |
| <\$20,000                                                               | 44 (23.16)              | 19 (15.97)                       |      |
| \$20,000-79,999                                                         | 96 (50.53)              | 61 (51.26)                       |      |
| ≥\$80,000                                                               | 50 (26.32)              | 39 (32.77)                       |      |
| Child gender, n (%)                                                     |                         |                                  | 0.39 |
| Male                                                                    | 83 (43.68)              | 58 (48.74)                       |      |
| Female                                                                  | 107 (56.32)             | 61 (51.26)                       |      |
| Maternal BDE-47, n (GM ± GSD, ng/g lipid) <sup>a</sup>                  | 190 (20.52±2.58)        | 119 (19.45±2.67)                 | 0.63 |
| Maternal Sum <sub>4</sub> BDEs, n (GM ± GSD, ng/g lipid) <sup>a,b</sup> | 177 (37.58±2.59)        | 102 (37.95±2.62)                 | 0.94 |
| Bayley scores, n (mean ± SD)                                            |                         |                                  |      |
| MDI at age 1 year                                                       | 185 (93.44±9.73)        | 110 (94.43±10.13)                | 0.41 |
| PDI at age 1 year                                                       | 185 (91.51±13.33)       | 109 (92.56±13.25)                | 0.52 |
| MDI at age 2 years                                                      | 170 (90.00±14.02)       | 78 (89.97±12.93)                 | 0.99 |
| PDI at age 2 years                                                      | 170 (92.36±13.44)       | 78 (89.50±13.52)                 | 0.12 |
| MDI at age 3 years                                                      | 169 (93.69±13.34)       | 59 (92.69±14.73)                 | 0.63 |
| PDI at age 3 years                                                      | 168 (98.00±14.50)       | 58 (95.86±15.81)                 | 0.34 |

<sup>a</sup>GM: Geometric mean, GSD: Geometric standard deviation. <sup>b</sup>Sum<sub>4</sub>BDEs is the sum of BDE-47, -99, -100, and -153.

**Table S2.** Estimated score differences and 95% confidence intervals in Bayley Psychomotor Development Index and BASC-2 behavior rating scores at ages 1-5 years by a ten-fold increase in maternal BDE-47 concentration.<sup>a</sup>

| <b>Assessment</b>             | <b><math>\beta</math> (95% CI) of <math>\log_{10}</math>BDE-47</b> |
|-------------------------------|--------------------------------------------------------------------|
| Bayley PDI                    |                                                                    |
| 1 year                        | 0.28 (-3.49, 4.05)                                                 |
| 2 years                       | 2.59 (-1.67, 6.85)                                                 |
| 3 years                       | 0.58 (-4.37, 5.53)                                                 |
| BASC-2 Internalizing Problems |                                                                    |
| 2 years                       | -0.25 (-2.42, 1.91)                                                |
| 3 years                       | 1.86 (-1.20, 4.93)                                                 |
| 4 years                       | 2.27 (-0.84, 5.38)                                                 |
| 5 years                       | 0.72 (-2.49, 3.93)                                                 |
| BASC-2 Adaptive Skills        |                                                                    |
| 2 years                       | -0.14 (-2.24, 1.97)                                                |
| 3 years                       | 0.43 (-1.88, 2.74)                                                 |
| 4 years                       | 0.56 (-2.45, 3.57)                                                 |
| 5 years                       | 1.49 (-1.62, 4.60)                                                 |
| BASC-2 Attention Problems     |                                                                    |
| 2 years                       | -0.22 (-2.71, 2.28)                                                |
| 3 years                       | 1.49 (-0.99, 3.97))                                                |
| 4 years                       | 0.34 (-2.50, 3.18)                                                 |
| 5 years                       | 2.47 (-0.69, 5.63)                                                 |
| BASC-2 Aggression             |                                                                    |
| 2 years                       | 1.99 (-0.21, 4.19)                                                 |
| 3 years                       | 2.31 (-0.69, 5.32)                                                 |
| 4 years                       | 2.01 (-1.42, 5.44)                                                 |
| 5 years                       | 1.63 (-1.33, 4.59)                                                 |
| BASC-2 Anxiety                |                                                                    |
| 2 years                       | -1.31 (-3.41, 0.78)                                                |
| 3 years                       | -0.15 (-3.43, 3.14)                                                |
| 4 years                       | 2.35 (-0.83, 5.53)                                                 |
| 5 years                       | -0.70 (-4.05, 2.64)                                                |
| BASC-2 Withdrawal             |                                                                    |
| 2 years                       | -0.54 (-2.91, 1.82)                                                |
| 3 years                       | -0.99 (-3.71, 1.72)                                                |
| 4 years                       | 1.38 (-1.53, 4.30)                                                 |
| 5 years                       | -0.29 (-3.15, 2.56)                                                |

<sup>a</sup>Adjusted for maternal age at enrollment, race, education, marital status, maternal serum cotinine concentrations at enrollment, maternal IQ, child sex, maternal depression, household income, and HOME Inventory.

**Table S3.** Estimated score differences and 95% confidence intervals in cognitive and behavior rating scores at ages 1-5 years by a ten-fold increase in maternal Sum<sub>4</sub>BDEs concentration.<sup>a,b</sup>

| <b>Age</b> | <b>Bayley MDI/WPPSI FSIQ</b> | <b>BASC-2 Externalizing Problems</b> | <b>BASC-2 Hyperactivity subscale</b> | <b>BASC-2 Behavioral Symptoms Index</b> |
|------------|------------------------------|--------------------------------------|--------------------------------------|-----------------------------------------|
| 1 year     | -0.77 (-3.84, 2.30)          | --                                   | --                                   | --                                      |
| 2 years    | -1.67 (-5.66, 2.31)          | 1.83 (-0.56, 4.22)                   | 2.09 (-0.63, 4.80)                   | 0.89 (-1.28, 3.06)                      |
| 3 years    | -1.13 (-5.14, 2.89)          | 2.53 (-0.32, 5.38)                   | 3.11 (0.22, 6.00)                    | 2.44 (-0.31, 5.20)                      |
| 4 years    | --                           | 2.57 (-0.71, 5.85)                   | 2.92 (-0.30, 6.14)                   | 2.48 (-0.49, 5.44)                      |
| 5 years    | -4.38 (-8.90, 0.14)          | 2.70 (-0.39, 5.80)                   | 3.35 (0.18, 6.52)                    | 2.90 (-0.18, 5.99)                      |

<sup>a</sup>Adjusted for maternal age at enrollment, race, education, marital status, maternal serum cotinine concentrations at enrollment, maternal IQ, child sex, maternal depression, household income, and HOME Inventory. <sup>b</sup>Sum<sub>4</sub>BDEs is the sum of BDE-47, -99, -100, and -153.

**Table S4.** Estimated odds ratios and 95% confidence intervals of having cognitive and behavior rating scores one standard deviation from the population mean at ages 1-5 years by a ten-fold increase in maternal Sum<sub>4</sub>BDEs concentration.<sup>a,b</sup>

| <b>Age</b> | <b>N (%)<br/>MDI/FSIQ<br/>&lt;85</b> | <b>OR (95% CI)<br/>MDI/FSIQ &lt;85</b> | <b>N (%)<br/>Externalizing<br/>Problems ≥60</b> | <b>OR (95% CI)<br/>Externalizing<br/>Problems ≥60</b> | <b>N (%)<br/>Hyperactivity<br/>subscale ≥60</b> | <b>OR (95% CI)<br/>Hyperactivity<br/>subscale ≥60</b> | <b>N (%)<br/>Behavioral<br/>Symptoms<br/>Index ≥60</b> | <b>OR (95% CI)<br/>Behavioral<br/>Symptoms Index<br/>≥60</b> |
|------------|--------------------------------------|----------------------------------------|-------------------------------------------------|-------------------------------------------------------|-------------------------------------------------|-------------------------------------------------------|--------------------------------------------------------|--------------------------------------------------------------|
| 1 year     | 48 (18.75)                           | 1.17 (0.47, 2.88)                      | --                                              | --                                                    | --                                              | --                                                    | --                                                     | --                                                           |
| 2 years    | 71 (32.87)                           | 0.69 (0.30, 1.57)                      | 12 (5.56)                                       | 4.96 (1.94, 12.66)                                    | 26 (12.04)                                      | 2.90 (1.04, 8.11)                                     | 12 (5.56)                                              | 1.25 (0.41, 3.83)                                            |
| 3 years    | 49 (24.50)                           | 1.39 (0.59, 3.31)                      | 34 (16.50)                                      | 2.04 (0.94, 4.41)                                     | 29 (14.08)                                      | 2.28 (0.93, 5.60)                                     | 28 (13.59)                                             | 2.23 (0.88, 5.62)                                            |
| 4 years    | --                                   | --                                     | 16 (10.53)                                      | 2.09 (0.68, 6.44)                                     | 16 (10.52)                                      | 3.16 (0.90, 11.12)                                    | 11 (7.24)                                              | 2.24 (0.48, 10.39)                                           |
| 5 years    | 23 (13.86)                           | 1.80 (0.39, 8.30)                      | 17 (10.00)                                      | 3.30 (0.73, 14.83)                                    | 18 (10.59)                                      | 5.38 (1.78, 16.32)                                    | 16 (9.41)                                              | 4.40 (1.02, 18.92)                                           |

<sup>a</sup>Adjusted for maternal age at enrollment, race, education, marital status, maternal serum cotinine concentrations at enrollment, maternal IQ, child sex, maternal depression, household income, and HOME Inventory. <sup>b</sup>Sum<sub>4</sub>BDEs is the sum of BDE-47, -99, -100, and -153.

**Table S5.** Estimated score differences and 95% confidence intervals of Bayley MDI and WPPSI FSIQ in separate models by a ten-fold increase in maternal PBDE concentration<sup>a</sup>

| <b>Outcome</b>          | <b>Log10 BDE-47</b> | <b>Log10 Sum<sub>4</sub>BDEs<sup>b</sup></b> |
|-------------------------|---------------------|----------------------------------------------|
| Bayley MDI <sup>c</sup> |                     |                                              |
| 1 year                  | -0.83 (-3.80, 2.14) | -0.83 (-3.90, 2.24)                          |
| 2 years                 | -1.84 (-5.66, 1.98) | -1.84 (-5.84, 2.17)                          |
| 3 years                 | -1.98 (-5.77, 1.81) | -1.44 (-5.49, 2.60)                          |
| WPPSI FSIQ <sup>d</sup> |                     |                                              |
| 5 years                 | -4.17 (-8.91, 0.56) | -4.47 (-9.36, 0.43)                          |

<sup>a</sup>Adjusted for maternal age at enrollment, race, education, marital status, maternal serum cotinine concentrations at enrollment, maternal IQ, child sex, maternal depression, household income, and HOME Inventory. <sup>b</sup>Sum<sub>4</sub>BDEs is the sum of BDE-47, -99, -100, and -153. <sup>c</sup>Covariates adjusted Mixed model for Bayley MDI including ages 1 to 3 years. <sup>d</sup>Covariates adjusted linear model for WPPSI FSIQ at age 5 years.
